# Supplementary material for: One-step efficient generation of dual-function conditional knockout and geno-tagging alleles in zebrafish
Source: eLife journal article supplement (doi:10.7554/elife.48081), 2019-10-30

Figure 2-figure supplement 2

A

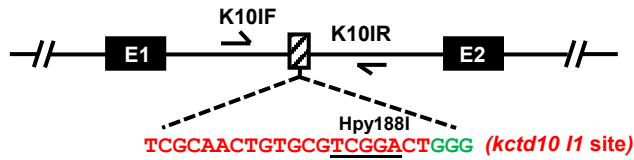

C

Ref. AATTAATCGCAACTGTGCGTTCGGACTGGGTTTCT  
Δ6 AATTAATCGCAACTGTGC-----CTGGGTTTCT  
Δ8 AATTAATCGCAACTGTGCGT-----GTTTCT  
+5 AATTAATCGCAACTGTGCGTCTATTGCGACTGGGTTTCT  
+2 AATTAATCGCAACTGTGCGTCTGGACTGGGTTTCT

D

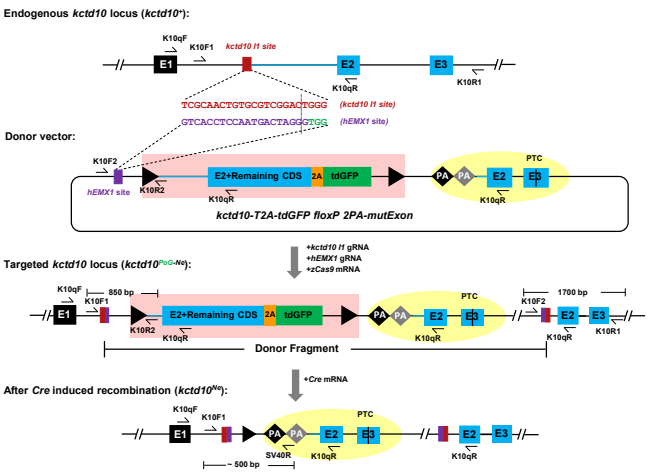

E

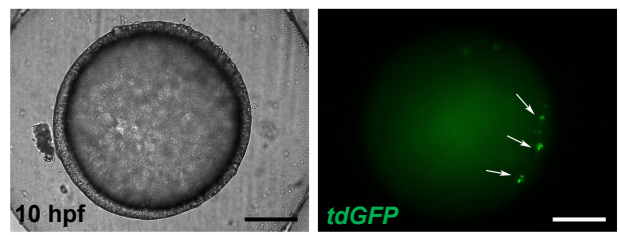

F

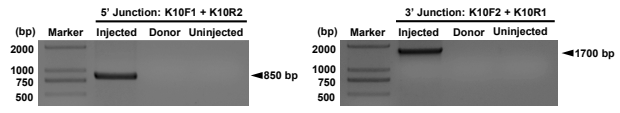

G

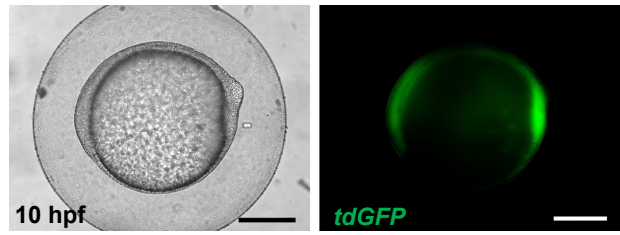

B

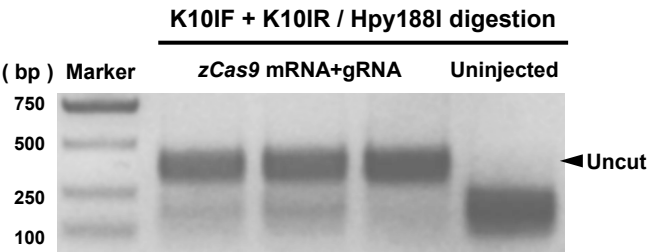

H

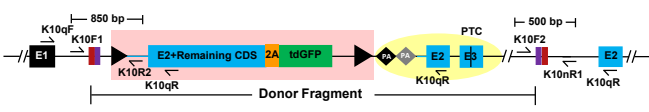

I

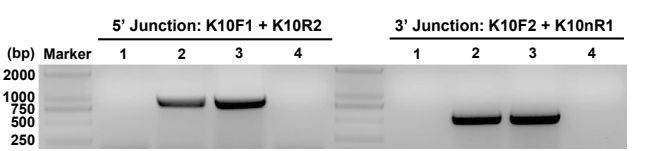

J

5' junction : (kctd10<sup>P0G-Ne-1</sup>)  
Ref. TCGCAACTGCGTCGG-----GGGTGG  
Seq. TCGCAACTGCGTC-----AGGAACAGCTATGACCATGATTACAGATCTGTACCTCCAA-----TGG  
3' junction : (kctd10<sup>P0G-Ne-1</sup>)  
Ref. TTACAGATCTGTACCTCCAAATGACTA-----ACTGGGTTTCTCATTT  
Seq. TTACAGATCTGTCA-----TCTGTCACTATCGTCTTGAGTGG-----CTCATTT

K

5' junction : (kctd10<sup>P0G-Ne-2</sup>)  
Ref. CGTGACGTCATTAAATTAATCGCAACTGTGCGTCGG-----GGGTGGCTCATTCGGTGAGAGCTGTTGT  
Seq. CGTGACGTCATTAAATTAATCGCAACTGTGCGTCGGTA--GGTGGCTCATTCGGTGAGAGCTGTTGT  
3' junction : (kctd10<sup>P0G-Ne-2</sup>)  
Ref. ACCATGATTACAGATCTGTACCTCCAAATGACTA-----ACTGGGTTTCTCATTCGGTGA  
Seq. ACCATGATTACAGAT-----GCTGGGTGATTACTGGGTTTCTCATTCGGTGA

L

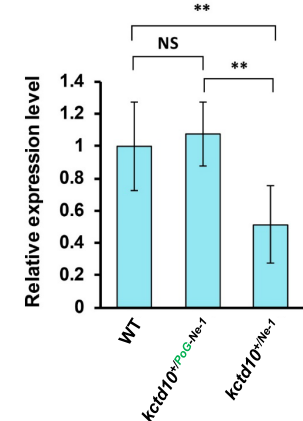

M

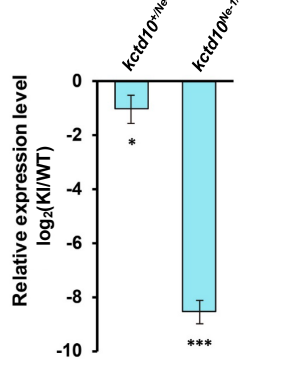

Supplement: supp [file elife_poa_e48081_Figure_2_figure_supplement_2.pdf › elife_poa_e48081_Figure_2_figure_supplement_2.pdf]
