# Supplementary material for: One-step efficient generation of dual-function conditional knockout and geno-tagging alleles in zebrafish
Source: eLife journal article supplement (doi:10.7554/elife.48081), 2019-10-30

Figure 4-figure supplement 1

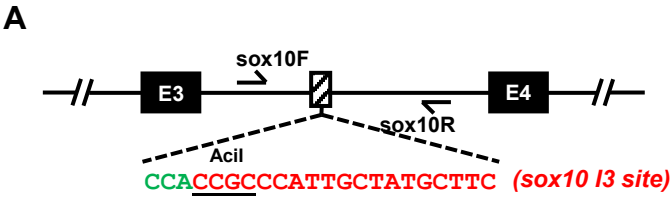

**C**

Ref. CCGATGCCA CCGCCCATTGCTATGCTTCACATTAG

$\Delta 3$  CCGATGCCACC --- CATTGCTATGCTTCACATTAG

$\Delta 4$  CCGATGCCACCG --- TTGCTATGCTTCACATTAG

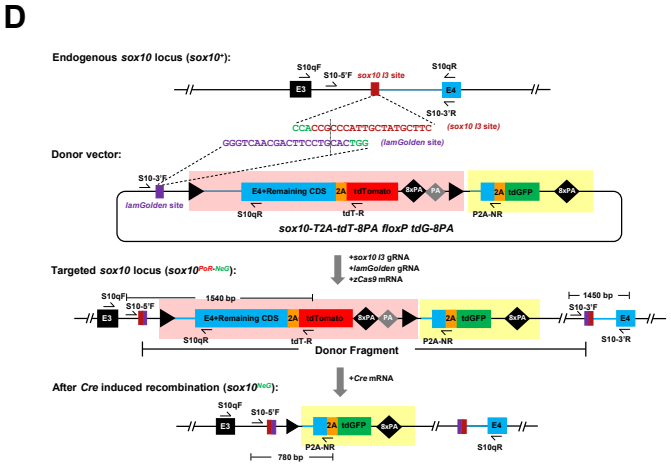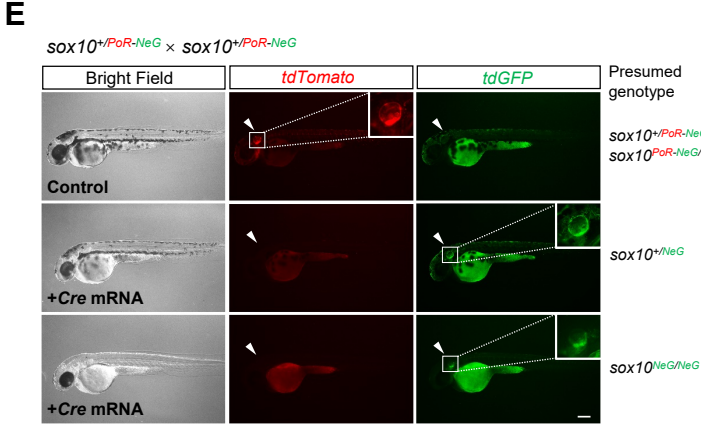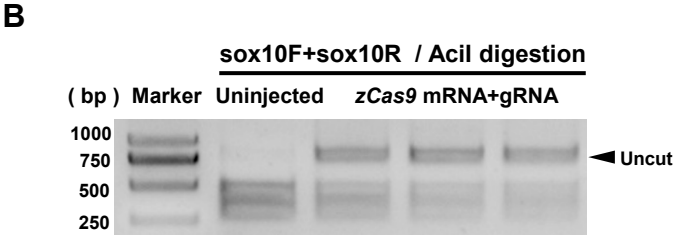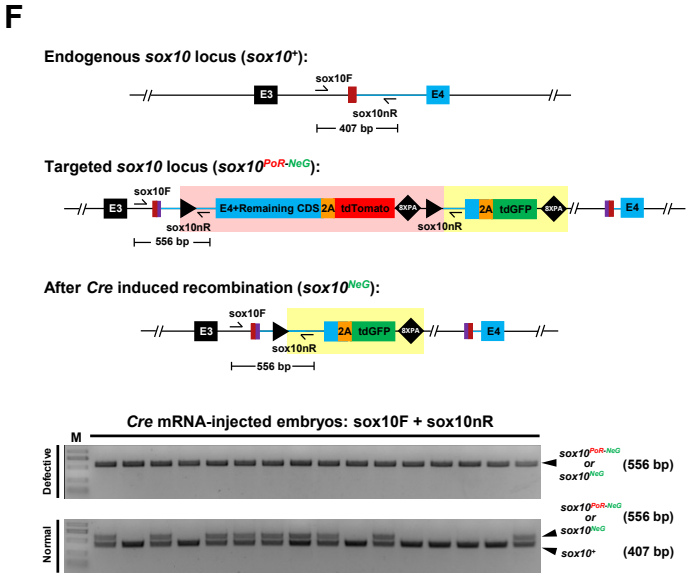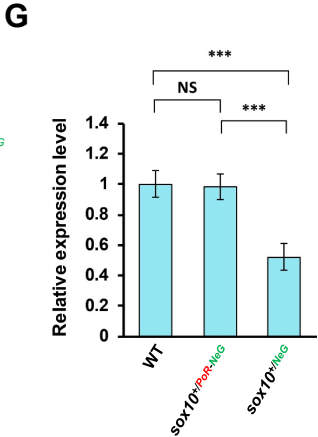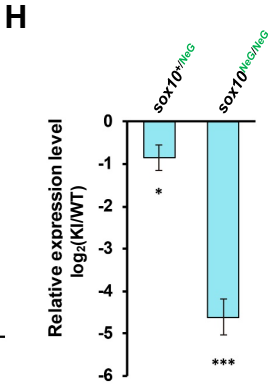

Supplement: supp [file elife_poa_e48081_Figure_4_figure_supplement_1.pdf › elife_poa_e48081_Figure_4_figure_supplement_1.pdf]
