# Supplementary material for: One-step efficient generation of dual-function conditional knockout and geno-tagging alleles in zebrafish
Source: eLife. 2019 Oct 30;8:e48081. doi: 10.7554/eLife.48081 (PMC6845224; doi:10.7554/eLife.48081)
Supplement: Supplementary file 1. [file elife-48081-supp1.xlsx]

## Sheet: Supplymentary file 1
The Cas9/gRNA target sequences used in this study
Target gene (target site)	Target sequence*
tbx5a (intron2)	CCCGTGGGAATCGCTGACAGTTC (reverse strand)
tbx5a (exon3)	ACTTGCACGAGCGAGAGCTGTGG (forward strand)
kctd10 (intron1)	TCGCAACTGTGCGTCGGACTGGG (forward strand)
sox10 (intron3)	CCACCGCCCATTGCTATGCTTC (reverse strand)
hEMX1	GTCACCTCCAATGACTAGGGTGG (forward strand) (Lin et al. 2014)
lamGolden	GGGTCAACGACTTCCTGCACGGG (forward strand) (Zu et al. 2016)
*The underlined sequence represents PAM.
