# Supplementary material for: One-step efficient generation of dual-function conditional knockout and geno-tagging alleles in zebrafish
Source: eLife. 2019 Oct 30;8:e48081. doi: 10.7554/eLife.48081 (PMC6845224; doi:10.7554/eLife.48081)
Supplement: Supplementary file 2. [file elife-48081-supp2.xlsx]

## Sheet: Supplymentary file 2
Indel and knockin efficiencies in founder embryos
Target locus	Indel efficiency	Donor (linearization site)	Ratio of fluorescence-positive F0 embryos
tbx5a (intron 2)	~98%	tbx5a PoR-Ne (hEMX1)	18/119 (15.1%)
tbx5a (intron 2)	~98%	tbx5a geno-tagging PoR-NeG (hEMX1)	16/124 (12.9%)
tbx5a (exon 3)	~93%	/	/
kctd10 (intron 1)	~95%	kctd10 PoG-Ne (hEMX1)	22/107 (20.6%)
sox10 (intron 3)	~85%	sox10 geno-tagging PoR-NeG (lamGolden)	103/152 (67.8%)
