# Supplementary material for: One-step efficient generation of dual-function conditional knockout and geno-tagging alleles in zebrafish
Source: eLife. 2019 Oct 30;8:e48081. doi: 10.7554/eLife.48081 (PMC6845224; doi:10.7554/eLife.48081)
Supplement: Supplementary file 3. [file elife-48081-supp3.xlsx]

## Sheet: Supplymentary file 3
Germline mosaicism of the tbx5a PoR-Ne donor KI in each positive F0
F0 (founder)	Number of tdTomato-positive F1 embryos	Number of total F1 progeny	F0 mosaicism (ratio of tdTomato-positive F1 embryos)	Allele name
#3 (male)	15	89	0.169
#5 (male)	8	103	0.078
#6 (male)	2	58	0.034
#9 (male)	1	42	0.024
#12 (female)	49	112	0.438	tbx5aPoR-Ne
