# Supplementary material for: One-step efficient generation of dual-function conditional knockout and geno-tagging alleles in zebrafish
Source: eLife. 2019 Oct 30;8:e48081. doi: 10.7554/eLife.48081 (PMC6845224; doi:10.7554/eLife.48081)
Supplement: Supplementary file 4. [file elife-48081-supp4.xlsx]

## Sheet: Supplymentary file 4
Germline mosaicism of the kctd10 PoG-Ne donor KI in each positive F0
F0 (founder)	Number of tdGFP-positive F1 embryos	Number of total F1 progeny	F0 mosaicism (ratio of tdGFP-positive F1 embryos)	Allele name
#5 (male)	125	247	0.506	kctd10PoG-Ne-2
#32 (female)	9	101	0.089	kctd10PoG-Ne-1
