# Supplementary material for: One-step efficient generation of dual-function conditional knockout and geno-tagging alleles in zebrafish
Source: eLife. 2019 Oct 30;8:e48081. doi: 10.7554/eLife.48081 (PMC6845224; doi:10.7554/eLife.48081)
Supplement: Supplementary file 5. [file elife-48081-supp5.xlsx]

## Sheet: Supplymentary file 5
Germline mosaicism of the tbx5a geno-tagging PoR-NeG donor KI in F0
F0 (founder)	Number of tdTomato-positive F1 embryos	Number of total F1 progeny	F0 mosaicism (ratio of tdTomato-positive F1 embryos)	Allele name
#2 (male)	9	107	0.084
#42 (male)	28	72	0.389	tbx5aPoR-NeG
