# Supplementary material for: One-step efficient generation of dual-function conditional knockout and geno-tagging alleles in zebrafish
Source: eLife. 2019 Oct 30;8:e48081. doi: 10.7554/eLife.48081 (PMC6845224; doi:10.7554/eLife.48081)
Supplement: Supplementary file 6. [file elife-48081-supp6.xlsx]

## Sheet: Sheet1
Germline mosaicism of the sox10 geno-tagging PoR-NeG donor KI in F0
F0 (founder)	Number of tdTomato-positive F1 embryos	Number of total F1 progeny	F0 mosaicism (ratio of tdTomato-positive F1 embryos)	Allele name
#1 (male)	16	167	0.096
#2 (male)	11	91	0.121
#4 (female)	11	134	0.082
#5 (male)	24	103	0.233
#6 (male)	42	84	0.5	sox10PoR-NeG
#7 (male)	2	22	0.091
#9 (male)	39	107	0.365
#10 (male)	33	131	0.252
#11 (male)	57	137	0.416
#12 (female)	6	44	0.136
