# Supplementary material for: One-step efficient generation of dual-function conditional knockout and geno-tagging alleles in zebrafish
Source: eLife. 2019 Oct 30;8:e48081. doi: 10.7554/eLife.48081 (PMC6845224; doi:10.7554/eLife.48081)
Supplement: Supplementary file 7. [file elife-48081-supp7.xlsx]

## Sheet: Supplymentary file 7
The sequences of the primers used for PCR and qRT-PCR analyses
Primer name	Primer sequence	Corresponding figures
5’R2	AGGTCCAGGGTTCTCCTCCAC	Figure 3A, 3B
E3-1F	CGGCCGTCCTTATAGTCTATAAG	Figure 2B; Figure 2-figure supplement 1A, B
E3-1R	GCCGTGAGCACTAAGTCAATAAG	Figure 2B; Figure 2-figure supplement 1A, B
gapdh qF	GGGTGATGCAGGTGCTACTT	Figure 2-figure supplement 1E, 2L; Figure 3-figure supplement 1E; Figure 4-figure supplement 1G
gapdh qR	AAAGGAGCCAGGCAGTTGG	Figure 2-figure supplement 1E, 2L; Figure 3-figure supplement 1E; Figure 4-figure supplement 1G
K10CF	AGCTGCAGTTTGAATCAAGGT	Figure 2D; Figure 2-figure supplement 2D
K10F1	GCTGGTGTGCTAGTTTAACG	Figure 2E; Figure 2-figure supplement 2D, F, H, I
K10F2	CAGCTGGCACGACAGGTTTC	Figure 2E; Figure 2-figure supplement 2D, F, H, I
K10IF	GAGAACAAGCTGGTGTGCTAG	Figure 2-figure supplement 2A, B
K10IR	CCTTGATTCAAACTGCAGC	Figure 2-figure supplement 2A, B
K10nR1	CGTTCATAACGTTACCACTCCC	Figure 2E; Figure 2-figure supplement 2H, I
K10qF	GAATCGGGGAATTTCTATGG	Figure 2-figure supplement 2D, H, L
K10qR	ACATGGCCTTTAGCATGGTG	Figure 2-figure supplement 2D, H, L
K10R1	GAAAGTGTGACCAGGATGTTGC	Figure 2-figure supplement 2D, F
K10R2	CGCTCGACGATTGATAACTTCG	Figure 2E; Figure 2-figure supplement 2D, F, H, I
P2A-NR	GAAGTTAGTAGCTCCGCTTCC	Figure 4B; Figure 4-figure supplement 1D
S10-3’F	GTCAGTGAGCGAGGAAGCGGAAG	Figure 4B; Figure 4-figure supplement 1D
S10-3’R	CATCTTGGTAGAGTGTGTCACG	Figure 4B; Figure 4-figure supplement 1D
S10-5’F	CGGTATATAACGGTAGGCTAC	Figure 4B; Figure 4-figure supplement 1D
S10qF	GGTCAGCCACAGCCAATCGC	Figure 4-figure supplement 1D, G
S10qR	AGACGATGAGGCGGAGCTTC	Figure 4-figure supplement 1D, G
sox10F	TTGTTCTGTAGACTATCTAACAA	Figure 4-figure supplement 1A, B, F
sox10nR	GAAACTATACACTAGGTCCA	Figure 4-figure supplement 1F
sox10R	AGGGCTGTGACTCTGACCTGAGC	Figure 4-figure supplement 1A, B
SV40R	GATCTGGCCATCTAGAGCGGCCGCG	Figure 1A, 2B, 2D; Figure 2-figure supplement 2D
T5-5’R	CGCTCGACGATTGATAACTTCG	Figure 3A, 3B; Figure 3-figure supplement 1A
T5-inR	GCCGTGAGCACTAAGTCAATAAG	Figure 3A; Figure 3-figure supplement 1A
T5F1	GCAGATCTGCCGCTGATTTC	Figure 1A, 1D, 2B, 3A, 3B; Figure 1-figure supplement 1A, B, E; Figure 3-figure supplement 1A
T5F2	CCTGCGTTATCCCCTGATTC	Figure 1A, 1D, 3A, 3B; Figure 1-figure supplement 1E; Figure 3-figure supplement 1A
T5qF	CGTCATCGCAGACTACATAC	Figure 1A, 3A; Figure 2-figure supplement 1E; Figure 3-figure supplement 1E
T5qR	TGAAGCTGGGAAACATCCGC	Figure 1A, 3A; Figure 2-figure supplement 1E; Figure 3-figure supplement 1E
T5R1	CCACTCAATAAGTCCATTGAGC	Figure 1A, 1D, 3A, 3B; Figure 1-figure supplement 1A, B, E
T5R2	CATCGCAGGCTCAGCTTTCC	Figure 1A, 1D, 3A; Figure 1-figure supplement 1E
tdT-R	CTTTGATGACCTCCTCGCCC	Figure 4B; Figure 4-figure supplement 1D
