# Supplementary figures and images for: One-step efficient generation of dual-function conditional knockout and geno-tagging alleles in zebrafish
Source: eLife journal article supplement (doi:10.7554/elife.48081), 2019-10-30

**Figure 1-figure supplement 1**

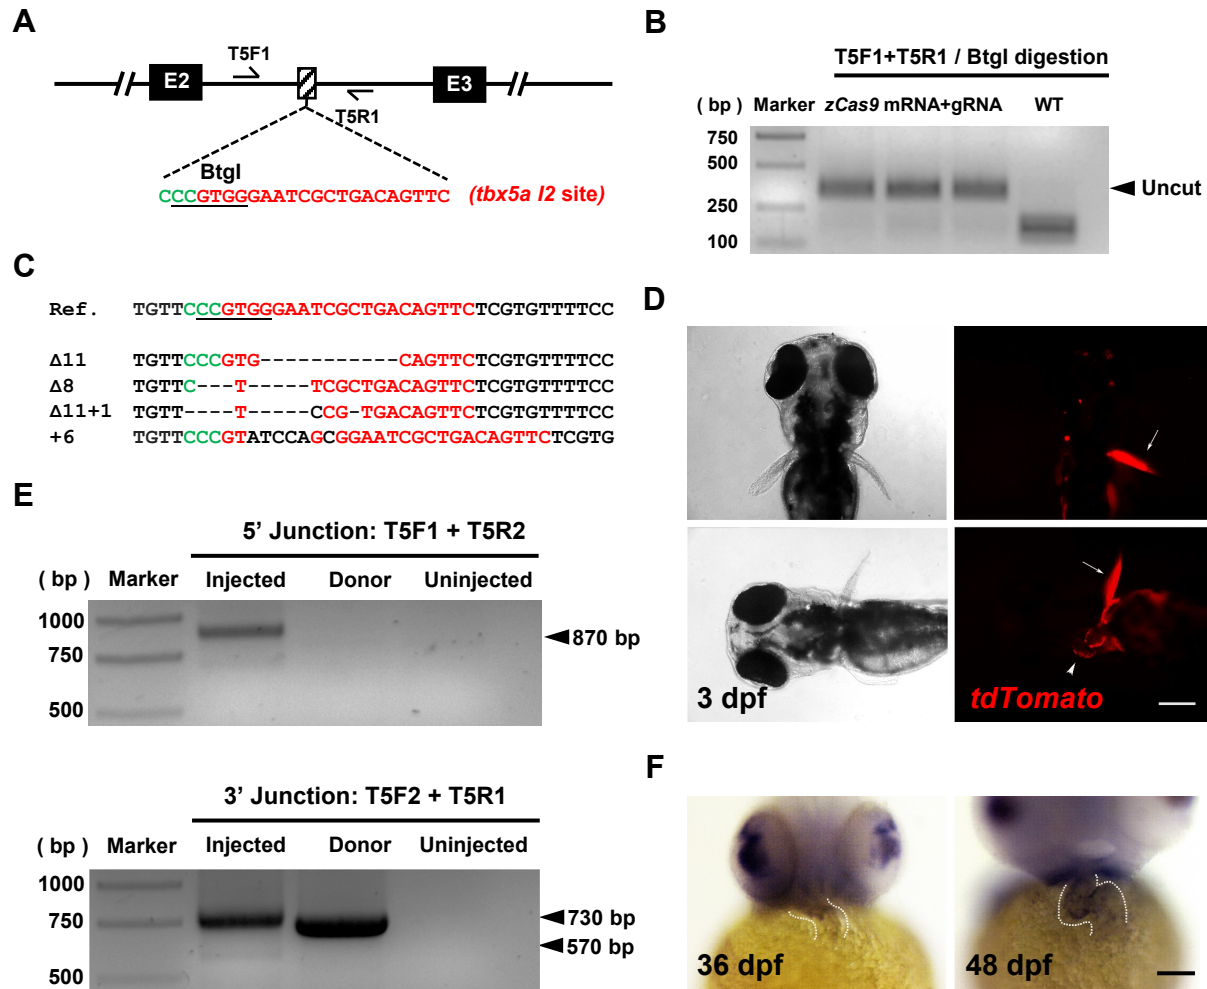

Supplement: supp [file elife_poa_e48081_Figure_1_figure_supplement_1.pdf › elife_poa_e48081_Figure_1_figure_supplement_1.pdf]

Figure 2-figure supplement 1

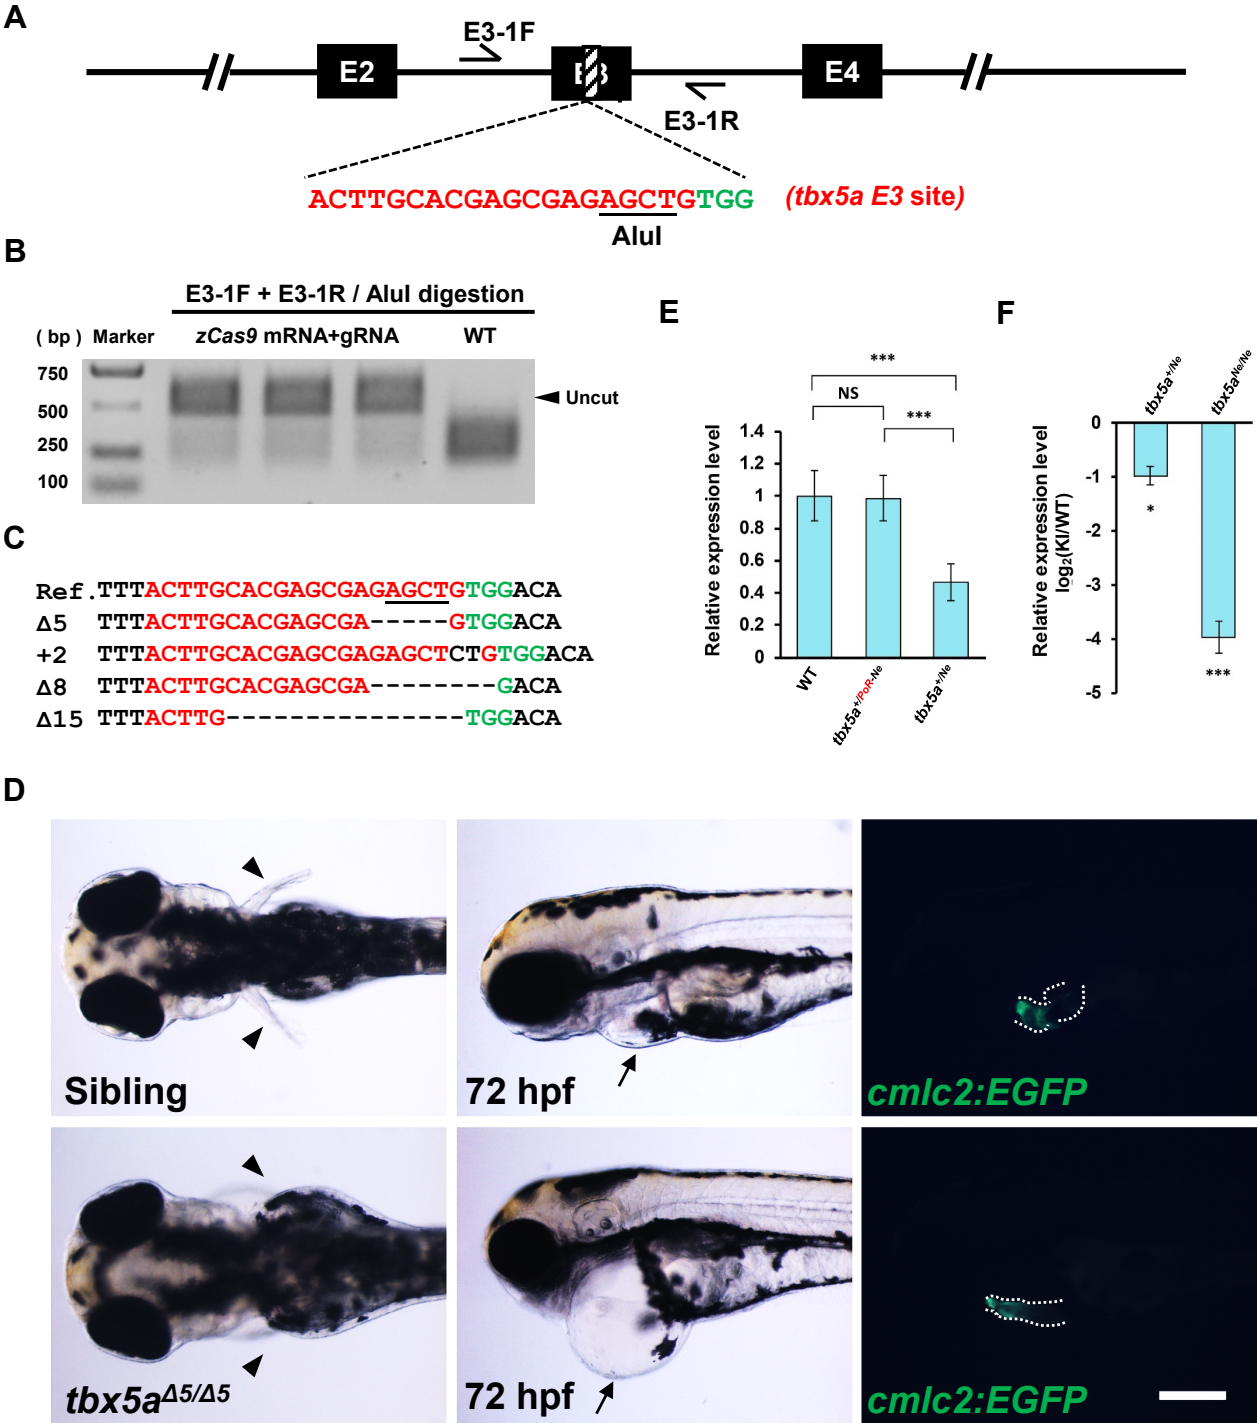

Supplement: supp [file elife_poa_e48081_Figure_2_figure_supplement_1.pdf › elife_poa_e48081_Figure_2_figure_supplement_1.pdf]

Figure 3-figure supplement 1

A

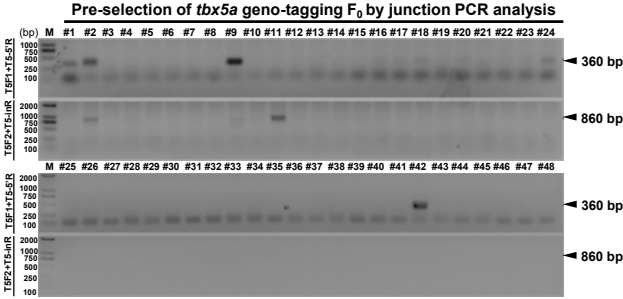

C

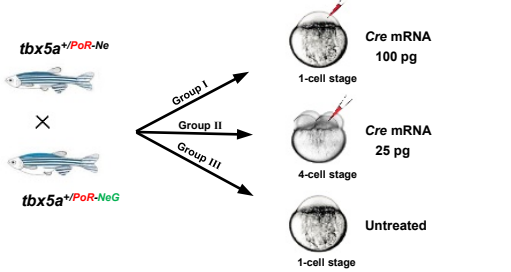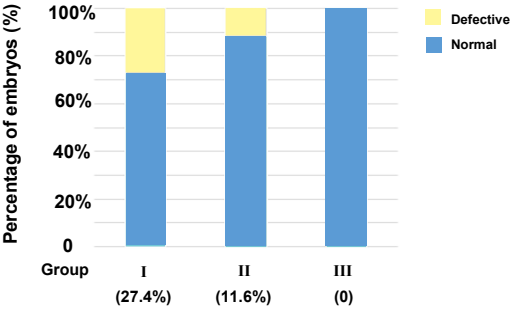

E

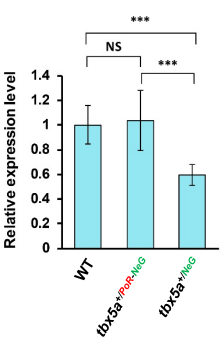

F

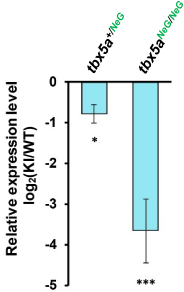

B

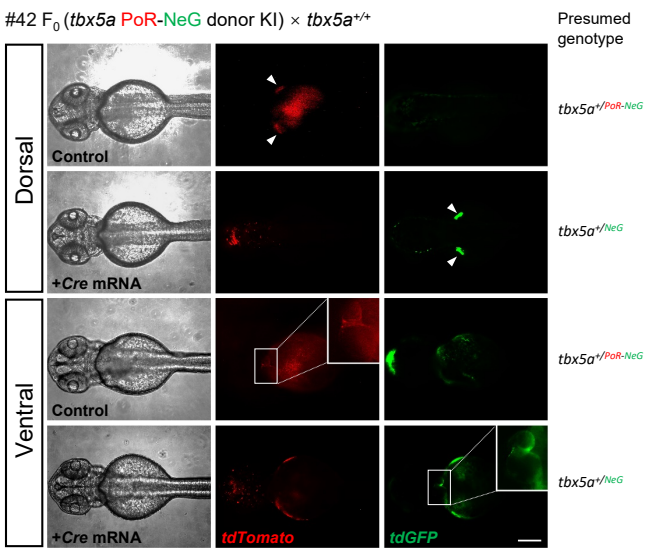

D

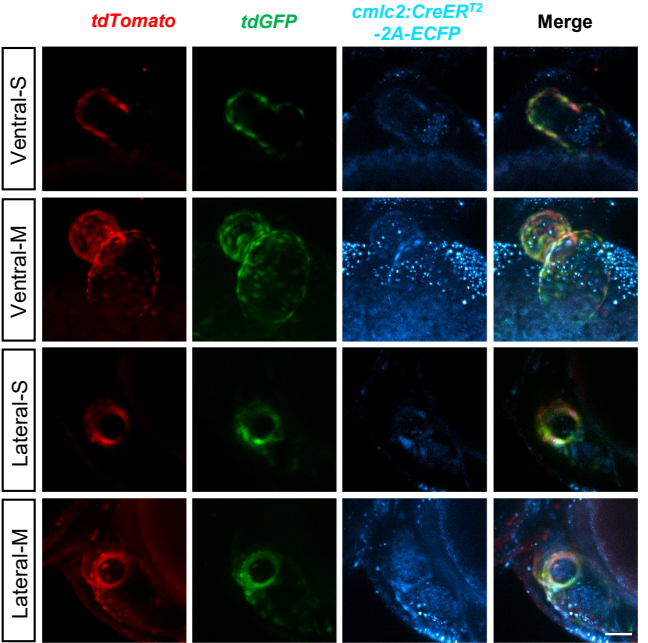

Supplement: supp [file elife_poa_e48081_Figure_3_figure_supplement_1.pdf › elife_poa_e48081_Figure_3_figure_supplement_1.pdf]
